# Supplementary material for: Development of a Korean Version of Simple, Intuitive Descriptions for Clinical Use of the Generic Functioning Domains in the ICD-11 Chapter V
Source: Research Square preprint supplement (doi:10.21203/rs.3.rs-514661/v1), 2021-07-09
Supplement: Supplementary file 1 [file 30a48461851cdc0aa9d7445a.docx]

Appendix 1.

| **No** | **Code** | **Title ENG** | **Simple intuitive descriptions** |
| --- | --- | --- | --- |
| 1 | VB60 | Voice and Speech Related Functions | Function of producing voice and speech |
| 2 | VB70 | Exercise tolerance functions | Cardiopulmonary functions to endure physical fatigue |
| 3 | VB80 | Functions related to the Digestive system | Function to eat and digest food |
| 4 | VB90 | Urinary Functions | Function to voluntarily control bladder and excrete urine |
| 5 | VB91 | Sexual functions | Mental and physical functions related to sexual activities |
| 6 | VC00 | Mobility of joint functions | Range and ease of movement of a joint |
| 7 | VC01 | Muscle power functions | Capacity to generate force through muscle contractions |
| 8 | VB40.5 | Functions of the skin and related structure | Functions to protect and restore the skin, nails, and hair |
| 9 | VC10 | Handling stress and other psychological demands | Manage and control psychological burdens to perform tasks in stressful, confusing, and critical situations |
| 10 | VA23 | Carrying out daily routine | Plan, manage, and carry out daily activities |
| 11 | VC20 | Transferring oneself | Moving while maintaining sitting or lying positions |
| 12 | VC21 | Carrying, moving and handling objects | Lifting, moving, and handling objects |
| 13 | VC22 | Moving around using equipment | Moving using mobility equipment (e.g., skate, ski, scuba) or mobility aids (e.g., wheelchairs) |
| 14 | VC23 | Using transportation | Moving by means of various transportations |
| 15 | VA11 | Changing body position - standing | Changing posture (e.g., getting out of a chair, lying on a bed, kneeling, bending over to pick up objects) |
| 16 | VA10 | Maintaining a standing position | Maintaining appropriate posture according to the situation (e.g., work or class) |
| 17 | VA14 | Walking | Walking step by step on ground |
| 18 | VA12 | Moving around within the home | Moving other than walking (e.g., running, climbing stairs, jumping, climbing, swimming) |
| 19 | VC30 | Caring for body parts | Caring for one's skin, teeth, hair, nails, and genitals |
| 20 | VC31 | Toileting | Self-management of urination, defecation, and menstruation |
| 21 | VC32 | Looking after one's health | Managing physical and mental health through a healthy lifestyle |
| 22 | VA20 | Washing oneself | Cleaning, washing, and drying all or parts of body |
| 23 | VA21 | Dressing | Choosing, wearing, and taking off clothes and shoes according to weather and social situation |
| 24 | VA22 | Eating | Eating food provided in the right order and as appropriate in the situation |
| 25 | VC40 | Preparing meals | Planning meals, preparing ingredients, cooking, and serving |
| 26 | VC41 | Assisting others | Assisting family members or others’ needs including learning, communication, self-care, mobility, and paying attention to one's health and well-being |
| 27 | VA42 | Doing housework | Doing housework such as cleaning and organizing, washing clothes, using household appliances, and disposing of garbage |
| 28 | VA40 | Taking care of household responsibilities | Carrying out one's household responsibilities |
| 29 | VA41 | Doing most important household tasks | Carrying out important household tasks |
| 30 | VC50 | Basic interpersonal interactions | Interacting with people through socially appropriate behavior as per the situation |
| 31 | VA30 | Relating with strangers | Interacting with strangers (e.g., asking for directions, buying things) |
| 32 | VA34 | Intimate relationships | Building and maintaining relationships with one’s husband/wife, lovers, and (sexual) partners |
| 33 | VA03 | Basic learning | Acquiring basic knowledge and skills or learning new tasks (e.g., imitation, language, repetition) |
| 34 | VA02 | Solving problems | Analyzing problems in daily life and applying solutions |
| 35 | VA04 | Communicating with - receiving - spoken messages | Understanding what has been said in general |
| 36 | VA05 | Conversation | Initiating, maintaining, and ending conversations appropriately according to the situation |
| 37 | VA43 | Remunerative employment | Performing an income-generating activity (e.g., job, labor) |
| 38 | VA50 | Recreation and leisure | Participating in hobbies or leisure activities |
| 39 | VA52 | Human rights | Maintain one’s dignity, value, and rights |
| 40 | VB00 | Energy and drive functions | Psychological energy and motivation to achieve goals and to meet needs and stay in control |
| 41 | VB01 | Sleep functions | Sleep cycle, quality and quantity |
| 42 | VB02 | Emotional functions | Mental functions related to regulating emotions |
| 43 | VA00 | Attention functions | Mental function to focus on one thing for a certain period |
| 44 | VA01 | Memory functions | Mental function to remember and retrieve information |
| 45 | VB10 | Sensation of pain | Unpleasant sensations detecting damage to body |
| 46 | VA90 | Seeing and related functions | Sensory functions related to visual sense of lights and objects |
| 47 | VA91 | Hearing and vestibular functions | Hearing and balance functions |
